# Supplementary material for: 4-Hydroxyestradiol Promotes Breast Carcinogenesis via Androgen Receptor: Evidence from Urinary Metabolite Profiling and Functional Studies
Source: Research Square preprint supplement (doi:10.21203/rs.3.rs-8136540/v1), 2025-12-17
Supplement: Supplementary file 1 [file e10bd93e05c326776a644027.xlsx]

## Sheet: Sheet1
Table 3. SwissTargetPrediction
Target	Common name	Uniprot ID	ChEMBL ID	Target Class	Probability*	Known actives (3D/2D)
Androgen Receptor (by homology)	AR	P10275	CHEMBL1871	Nuclear receptor	1	15 / 34
Adenylate cyclase type 10	ADCY10	Q96PN6	CHEMBL5854	Enzyme	0.715584	1 / 1
Estrogen receptor alpha	ESR1	P03372	CHEMBL206	Nuclear receptor	0.33674	27 / 97
Estrogen receptor beta	ESR2	Q92731	CHEMBL242	Nuclear receptor	0.33674	22 / 85
Testis-specific androgen-binding protein	SHBG	P04278	CHEMBL3305	Secreted protein	0.328396	8 / 19
Cytochrome P450 19A1	CYP19A1	P11511	CHEMBL1978	Cytochrome P450	0.262582	12 / 48
Serotonin transporter	SLC6A4	P31645	CHEMBL228	Electrochemical transporter	0.237885	23 / 53
Estrogen-related receptor alpha	ESRRA	P11474	CHEMBL3429	Nuclear receptor	0.237885	1 / 7
Estrogen-related receptor beta	ESRRB	O95718	CHEMBL3751	Nuclear receptor	0.237885	1 / 6
G-protein coupled estrogen receptor 1	GPER1	Q99527	CHEMBL5872	Family A G protein-coupled receptor	0.237885	1 / 1
Steryl-sulfatase	STS	P08842	CHEMBL3559	Enzyme	0.147257	23 / 112
DNA polymerase alpha subunit	POLA1	P09884	CHEMBL1828	Transferase	0.122582	0 / 15
Estradiol 17-beta-dehydrogenase 1	HSD17B1	P14061	CHEMBL3181	Enzyme	0.122582	8 / 47
Glucocorticoid receptor	NR3C1	P04150	CHEMBL2034	Nuclear receptor	0.114338	14 / 55
Insulin-like growth factor I receptor	IGF1R	P08069	CHEMBL1957	Kinase	0.1061	0 / 14
Tyrosine-protein kinase SRC	SRC	P12931	CHEMBL267	Kinase	0.1061	0 / 6
ALK tyrosine kinase receptor	ALK	Q9UM73	CHEMBL4247	Kinase	0.1061	0 / 6
Solute carrier family 22 member 2	SLC22A2	O15244	CHEMBL1743122	Electrochemical transporter	0.1061	1 / 1
Norepinephrine transporter	SLC6A2	P23975	CHEMBL222	Electrochemical transporter	0.1061	20 / 38
Dopamine transporter	SLC6A3	Q01959	CHEMBL238	Electrochemical transporter	0.1061	8 / 38
Nuclear receptor subfamily 1 group I member 3	NR1I3	Q14994	CHEMBL5503	Nuclear receptor	0.1061	1 / 1
Arachidonate 15-lipoxygenase	ALOX15	P16050	CHEMBL2903	Enzyme	0.0978745	0 / 18
Arachidonate 12-lipoxygenase	ALOX12	P18054	CHEMBL3687	Enzyme	0.0978745	0 / 11
G-protein coupled receptor 55	GPR55	Q9Y2T6	CHEMBL1075322	Family A G protein-coupled receptor	0.0978745	0 / 2
N-arachidonyl glycine receptor	GPR18	Q14330	CHEMBL2384898	Family A G protein-coupled receptor	0.0978745	0 / 1
Serotonin 2b (5-HT2b) receptor	HTR2B	P41595	CHEMBL1833	Family A G protein-coupled receptor	0.0978745	0 / 2
Serotonin 1b (5-HT1b) receptor	HTR1B	P28222	CHEMBL1898	Family A G protein-coupled receptor	0.0978745	0 / 10
Serotonin 1a (5-HT1a) receptor	HTR1A	P08908	CHEMBL214	Family A G protein-coupled receptor	0.0978745	0 / 112
Serotonin 7 (5-HT7) receptor	HTR7	P34969	CHEMBL3155	Family A G protein-coupled receptor	0.0978745	0 / 2
Serotonin 6 (5-HT6) receptor	HTR6	P50406	CHEMBL3371	Family A G protein-coupled receptor	0.0978745	0 / 1
Vascular endothelial growth factor receptor 2	KDR	P35968	CHEMBL279	Kinase	0.0978745	2 / 6
Vanilloid receptor	TRPV1	Q8NER1	CHEMBL4794	Voltage-gated ion channel	0.0978745	0 / 1
Aldo-keto-reductase family 1 member C3	AKR1C3	P42330	CHEMBL4681	Enzyme	0.0978745	0 / 14
Tyrosine-protein kinase FYN	FYN	P06241	CHEMBL1841	Kinase	0.0978745	0 / 5
LXR-alpha	NR1H3	Q13133	CHEMBL2808	Nuclear receptor	0.0978745	0 / 22
LXR-beta	NR1H2	P55055	CHEMBL4093	Nuclear receptor	0.0978745	0 / 21
Prostaglandin E synthase	PTGES	O14684	CHEMBL5658	Enzyme	0.0978745	0 / 7
Arachidonate 5-lipoxygenase	ALOX5	P09917	CHEMBL215	Oxidoreductase	0.0978745	0 / 17
Transthyretin	TTR	P02766	CHEMBL3194	Secreted protein	0.0978745	0 / 2
Leukotriene B4 receptor 1	LTB4R	Q15722	CHEMBL3911	Family A G protein-coupled receptor	0.0978745	0 / 3
Histone deacetylase 3	HDAC3	O15379	CHEMBL1829	Eraser	0.0978745	0 / 2
Focal adhesion kinase 1	PTK2	Q05397	CHEMBL2695	Kinase	0.0978745	0 / 3
5-lipoxygenase activating protein	ALOX5AP	P20292	CHEMBL4550	Other cytosolic protein	0.0978745	0 / 2
Progesterone receptor	PGR	P06401	CHEMBL208	Nuclear receptor	0.0978745	3 / 18
Cytochrome P450 24A1 (by homology)	CYP24A1	Q07973	CHEMBL4521	Enzyme	0.0978745	0 / 8
Tyrosinase	TYR	P14679	CHEMBL1973	Oxidoreductase	0.0978745	0 / 13
Cannabinoid receptor 2	CNR2	P34972	CHEMBL253	Family A G protein-coupled receptor	0.0978745	2 / 151
Sigma opioid receptor (by homology)	SIGMAR1	Q99720	CHEMBL287	Membrane receptor	0.0978745	0 / 180
Cannabinoid receptor 1	CNR1	P21554	CHEMBL218	Family A G protein-coupled receptor	0	1 / 141
Bile acid receptor FXR	NR1H4	Q96RI1	CHEMBL2047	Nuclear receptor	0	0 / 3
Estradiol 17-beta-dehydrogenase 2	HSD17B2	P37059	CHEMBL2789	Enzyme	0	1 / 2
Acetylcholinesterase	ACHE	P22303	CHEMBL220	Hydrolase	0	0 / 29
Beta-1 adrenergic receptor (by homology)	ADRB1	P08588	CHEMBL213	Family A G protein-coupled receptor	0	0 / 5
Cytochrome P450 17A1 (by homology)	CYP17A1	P05093	CHEMBL3522	Cytochrome P450	0	25 / 0
DNA polymerase beta (by homology)	POLB	P06746	CHEMBL2392	Enzyme	0	0 / 3
Glucose-6-phosphate 1-dehydrogenase	G6PD	P11413	CHEMBL5347	Enzyme	0	4 / 0
Dopamine D3 receptor	DRD3	P35462	CHEMBL234	Family A G protein-coupled receptor	0	0 / 76
Thymidine phosphorylase	TYMP	P19971	CHEMBL3106	Enzyme	0	4 / 0
Cholesteryl ester transfer protein	CETP	P11597	CHEMBL3572	Other ion channel	0	0 / 3
Adrenergic receptor alpha-2	ADRA2C	P18825	CHEMBL1916	Family A G protein-coupled receptor	0	0 / 3
Alpha-2b adrenergic receptor	ADRA2B	P18089	CHEMBL1942	Family A G protein-coupled receptor	0	0 / 3
Serotonin 2c (5-HT2c) receptor	HTR2C	P28335	CHEMBL225	Family A G protein-coupled receptor	0	0 / 5
Neurokinin 2 receptor	TACR2	P21452	CHEMBL2327	Family A G protein-coupled receptor	0	0 / 2
Beta-3 adrenergic receptor	ADRB3	P13945	CHEMBL246	Family A G protein-coupled receptor	0	0 / 1
Sonic hedgehog protein (by homology)	SHH	Q15465	CHEMBL5602	Unclassified protein	0	0 / 1
Plasminogen	PLG	P00747	CHEMBL1801	Protease	0	5 / 0
Tissue-type plasminogen activator	PLAT	P00750	CHEMBL1873	Protease	0	4 / 0
Kallikrein 1	KLK1	P06870	CHEMBL2319	Protease	0	5 / 0
Urokinase-type plasminogen activator	PLAU	P00749	CHEMBL3286	Protease	0	6 / 0
Type-1 angiotensin II receptor (by homology)	AGTR1	P30556	CHEMBL227	Family A G protein-coupled receptor	0	2 / 0
Serine/threonine-protein kinase AKT	AKT1	P31749	CHEMBL4282	Kinase	0	0 / 16
Delta opioid receptor	OPRD1	P41143	CHEMBL236	Family A G protein-coupled receptor	0	3 / 232
Nitric oxide synthase, inducible	NOS2	P35228	CHEMBL4481	Enzyme	0	1 / 0
Carbonic anhydrase VI	CA6	P23280	CHEMBL3025	Lyase	0	0 / 8
Carbonic anhydrase IV	CA4	P22748	CHEMBL3729	Lyase	0	0 / 9
Ribosomal protein S6 kinase alpha 5	RPS6KA5	O75582	CHEMBL4237	Kinase	0	1 / 0
Neurokinin 1 receptor (by homology)	TACR1	P25103	CHEMBL249	Family A G protein-coupled receptor	0	1 / 0
Carbonic anhydrase II	CA2	P00918	CHEMBL205	Lyase	0	1 / 22
Carbonic anhydrase I	CA1	P00915	CHEMBL261	Lyase	0	2 / 14
Carbonic anhydrase IX	CA9	Q16790	CHEMBL3594	Lyase	0	2 / 4
Thromboxane A2 receptor	TBXA2R	P21731	CHEMBL2069	Family A G protein-coupled receptor	0	0 / 4
Dopamine D5 receptor	DRD5	P21918	CHEMBL1850	Family A G protein-coupled receptor	0	0 / 7
Dopamine D1 receptor	DRD1	P21728	CHEMBL2056	Family A G protein-coupled receptor	0	0 / 17
Prostanoid FP receptor	PTGFR	P43088	CHEMBL1987	Family A G protein-coupled receptor	0	0 / 8
Retinoid X receptor alpha	RXRA	P19793	CHEMBL2061	Nuclear receptor	0	0 / 13
Potassium-transporting ATPase alpha chain 2	ATP12A	P54707	CHEMBL2933	Primary active transporter	0	1 / 0
Adenosine A3 receptor	ADORA3	P0DMS8	CHEMBL256	Family A G protein-coupled receptor	0	1 / 5
Melanocortin receptor 4	MC4R	P32245	CHEMBL259	Family A G protein-coupled receptor	0	3 / 0
Cyclin-dependent kinase 1	CDK1	P06493	CHEMBL308	Kinase	0	0 / 1
GABA-B receptor	GABBR2 GABBR1	O75899 Q9UBS5	CHEMBL2111463	Family C G protein-coupled receptor	0	0 / 1
ELAV-like protein 1	ELAVL1	Q15717	CHEMBL1250379	Unclassified protein	0	0 / 1
Rho-associated protein kinase 2	ROCK2	O75116	CHEMBL2973	Kinase	0	10 / 0
UDP-glucuronosyltransferase 2B7	UGT2B7	P16662	CHEMBL4370	Enzyme	0	0 / 2
Catechol O-methyltransferase (by homology)	COMT	P21964	CHEMBL2023	Transferase	0	0 / 3
Glutamate NMDA receptor; GRIN1/GRIN2A	GRIN2A GRIN1	Q12879 Q05586	CHEMBL1907604	Ligand-gated ion channel	0	0 / 1
PH domain leucine-rich repeat-containing protein phosphatase 1	PHLPP1	O60346	CHEMBL3414405	Reader	0	0 / 1
Serine/threonine-protein kinase ILK-1	ILK	Q13418	CHEMBL5247	Kinase	0	0 / 1
Tyrosine-protein kinase JAK3	JAK3	P52333	CHEMBL2148	Kinase	0	1 / 0
Methionine aminopeptidase 2	METAP2	P50579	CHEMBL3922	Protease	0	10 / 0
C-C chemokine receptor type 1	CCR1	P32246	CHEMBL2413	Family A G protein-coupled receptor	0	4 / 0
